# Supplementary material for: Autophagy plays an important role in the containment of HIV-1 in nonprogressor-infected patients
Source: PubMed Central journal article supplement — Autophagy. 2014 Apr 29;10(7):1167–78. doi: 10.4161/auto.28678 (PMC4203545; doi:10.4161/auto.28678), 2014-04-29
Supplement: auto-10-1167-s01.pdf [file auto-10-1167-s01.pdf]

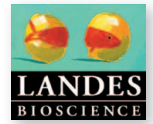

## **Supplemental Material to:**

**Roberta Nardacci, Alessandra Amendola,  
Fabiola Ciccocanti, Marco Corazzari, Valentina Esposito,  
Chrysoula Vlassi, Chiara Taibi, Gian Maria Fimia,  
Franca Del Nonno, Giuseppe Ippolito, Gianpiero D'Offizi,  
and Mauro Piacentini**

**Autophagy plays an important role in the containment of  
HIV-1 in nonprogressor-infected patients**

**Autophagy 2014; 10(7)**

**<http://dx.doi.org/10.4161/auto.28678>**

**[www.landesbioscience.com/journals/autophagy/article/28678](http://www.landesbioscience.com/journals/autophagy/article/28678)**

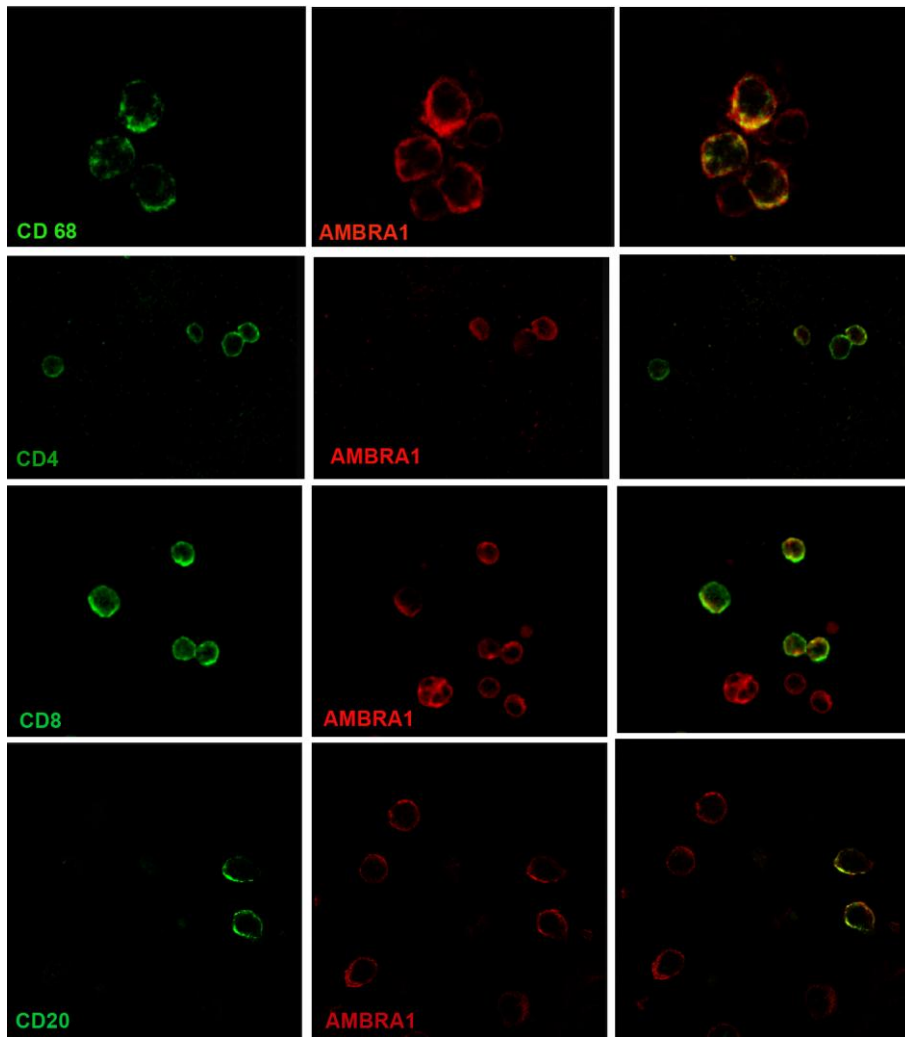

**Figure S1.** Confocal microscopy cell type immunocharacterization of AMBRA1-positive PBMC. Immunostaining of AMBRA1 (red) and the phenotypic markers CD68, CD4, CD8, MS4A1/CD20 (green) has been performed in PBMC from LTNP. The AMBRA1 positivity was present in all the analyzed subpopulations.

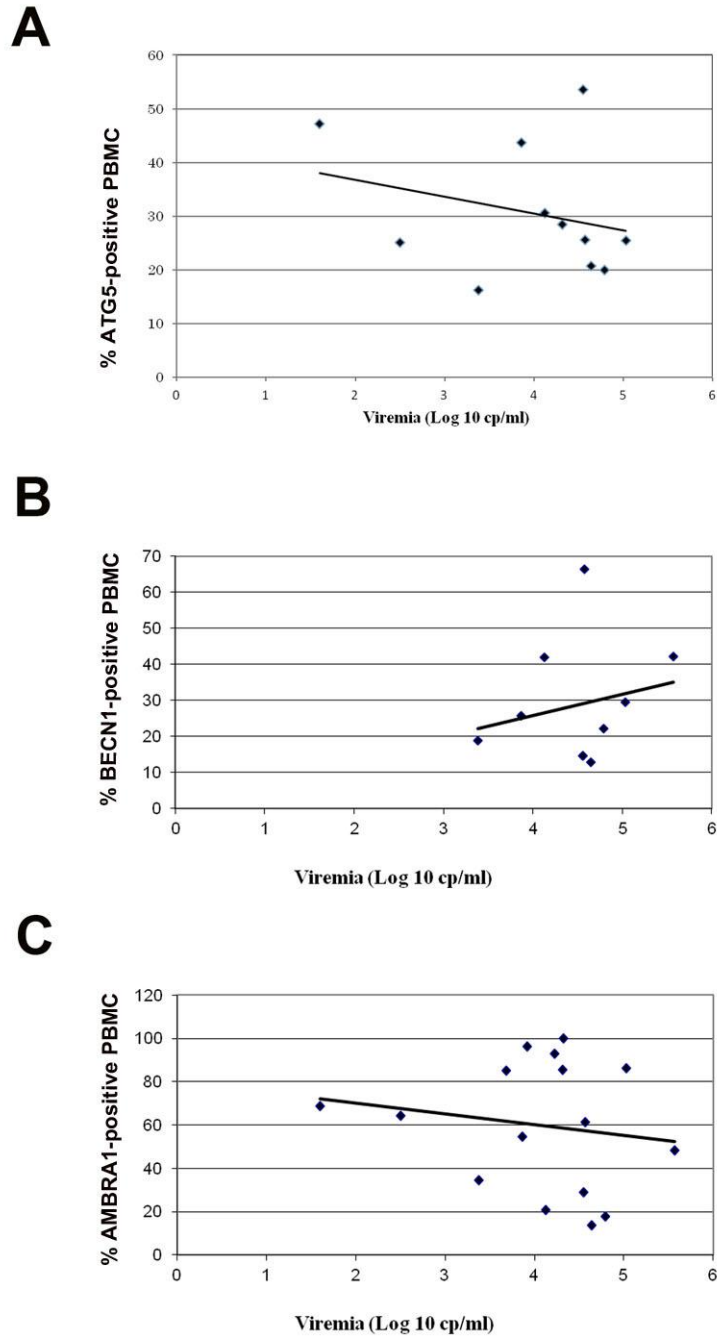

**Figure S2.** Correlation between autophagic markers expression and plasma viremia in PBMC. We analyzed the relationship existing between the autophagic markers ATG5 (**A**), BECN1 (**B**) and AMBRA1 (**C**) and plasma viremia (Log<sub>10</sub>cp/ml) in PBMC from HIV-1-infected patients. The data revealed that there is no a linear correlation between these parameters.

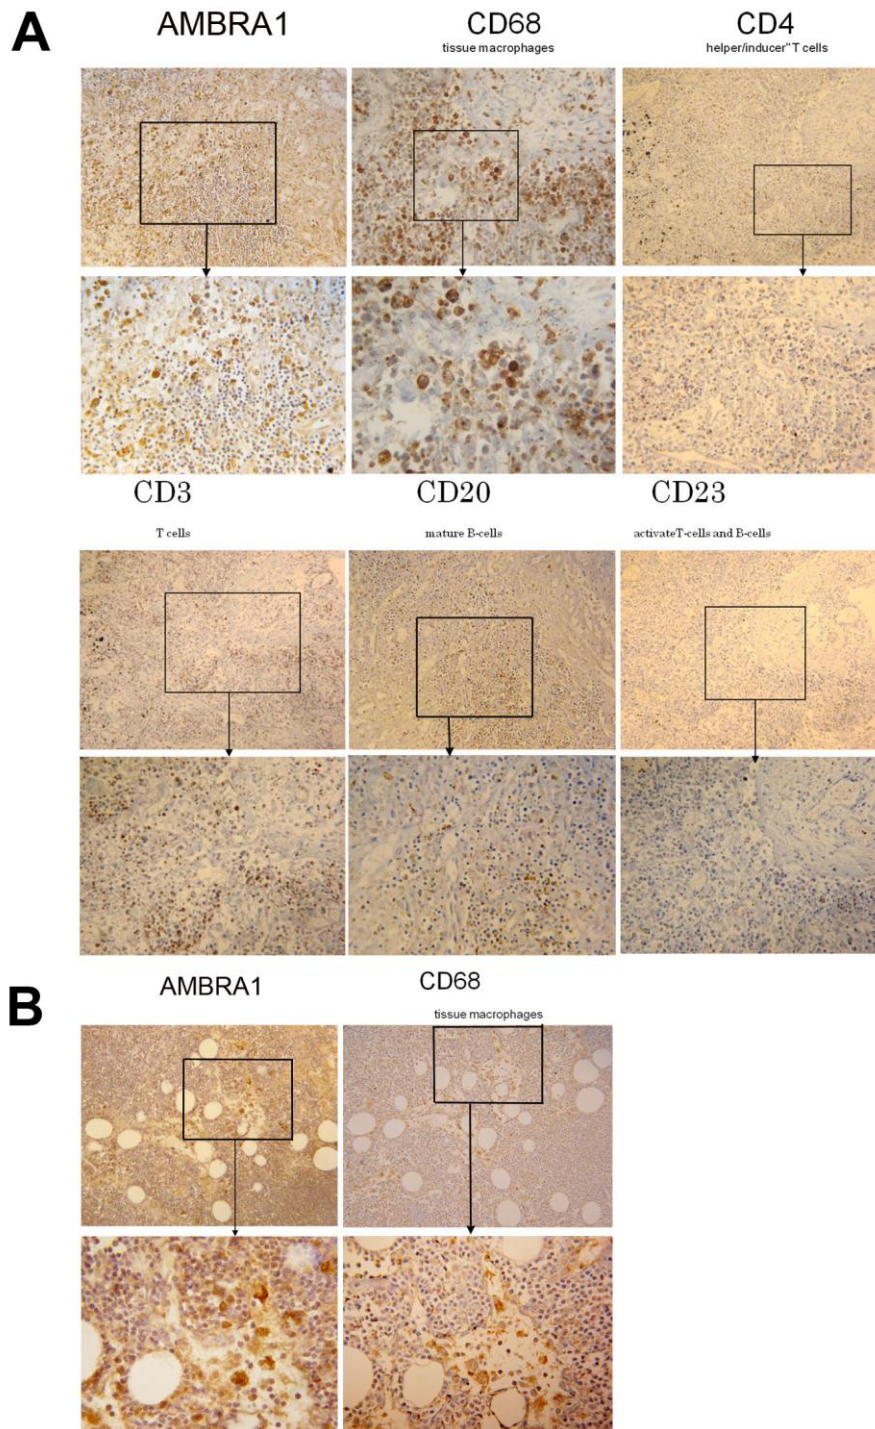

**Figure S3.** Cell type immunocharacterization of AMBRA1-positive lymph node cells. **(A)** Immunostaining of AMBRA1 and the phenotypic markers CD68, CD4, CD3, MS4A1/CD20, and FCER2/CD23 in consecutive sections of HIV-infected lymph nodes. The AMBRA1 positive cells showed preferentially colocalization with CD68 (tissue macrophages marker) positive cells **(B)** Axillary lymph node consecutive sections from HD showing few AMBRA1-positive cells that colocalize with CD68. Original magnifications: 20X (insets 40X, 63X).

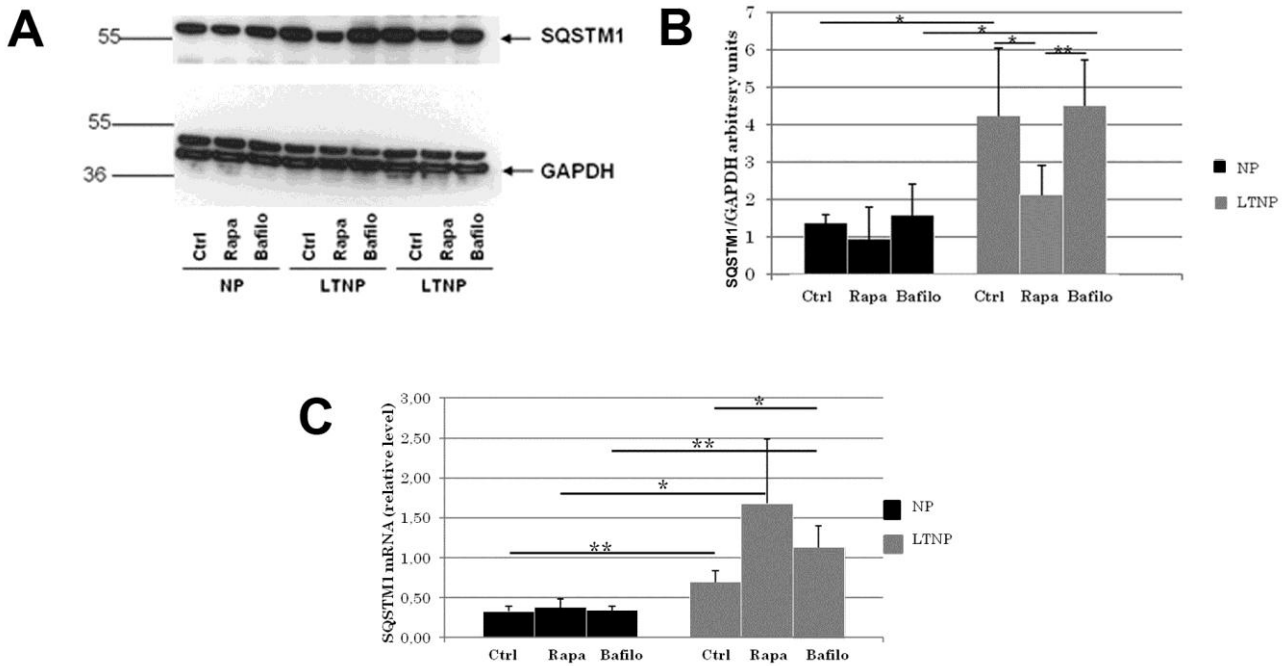

**Figure S4.** Pharmacological modulation of autophagy. Analysis of SQSTM1. The chemical compounds rapamycin and bafilomycin A<sub>1</sub>, were used to try to modulate autophagy in PBMC by *in-vitro* treatment. (A,B) WB analysis of SQSTM1 protein. (C) Quantification of *SQSTM1* mRNA relative level.

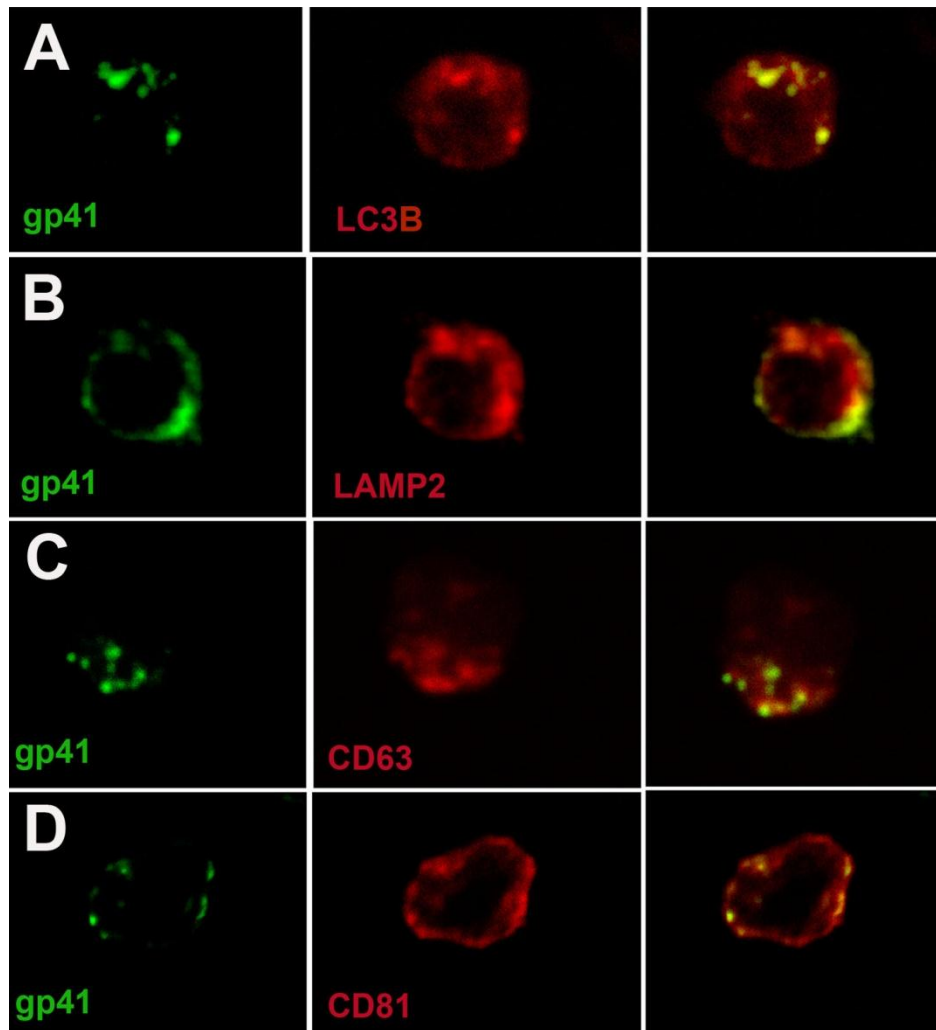

**Figure S5.** Confocal immunolocalization of the HIV-1 protein gp41 inside cellular compartments. (A) Confocal microscopy immunolocalization of the HIV-1 protein gp41 (green) and the AV membrane protein LC3B (red) in PBMC from LTNP. (B) Immunolocalization of the HIV-1 protein gp41 (green) and the lysosomal membrane protein LAMP2 (red) in PBMC from LTNP. (C) Confocal microscopy immunolocalization of the HIV-1 protein gp41 (green) and the tetraspanins CD63 (red). (D) Immunolocalization of the HIV-1 protein gp41 (green) and CD81 (red).
